# Supplementary material
Source: Springer Nature journal article supplement (https://www.springermedizin.de/resource/supplementary/12908_2007_48_MOESM1_ESM.pdf/9525310)

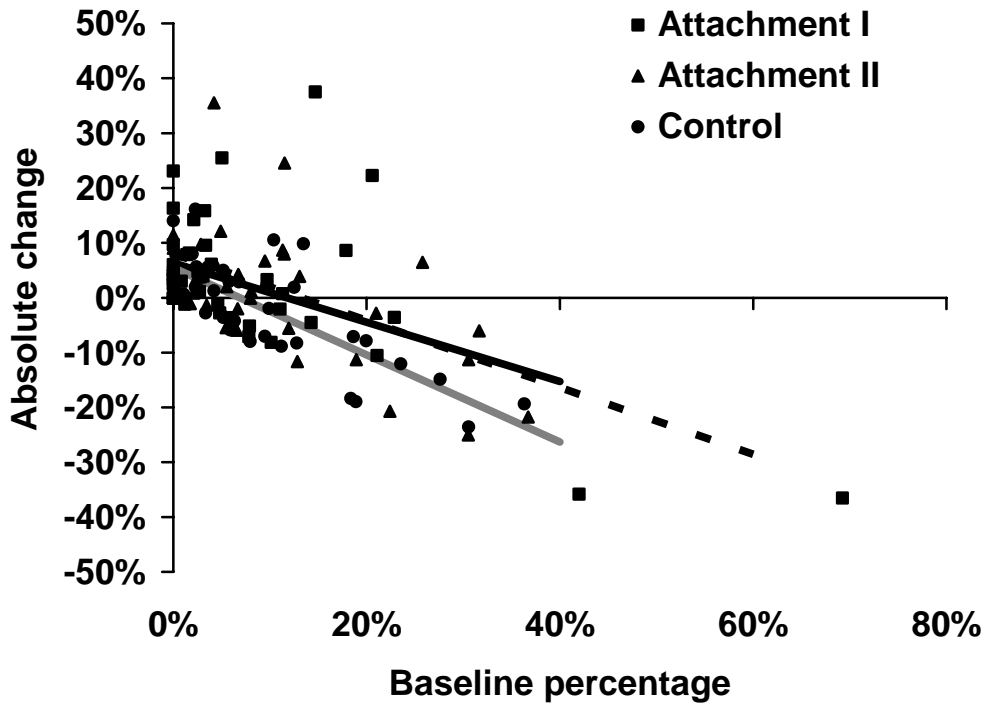

Supplement: MOESM1 [file 9525310]
